# Supplementary material for: Long-term Patterns of Excess Mortality among Endometrial Cancer Survivors
Source: Oxford University Press journal article supplement (doi:10.1158/1055-9965.epi-20-1631), 2021-03-18
Supplement: 10559965epi201631-sup-255551_2_supp_6952471_qp716c.docx [file 10559965epi201631-sup-255551_2_supp_6952471_qp716c.docx]

| Supplementary Table 1. Conditional relative survival among women with endometrial cancer, stratified by race and cancer characteristics, SEER 18, 2000-2012 | | | | | | | | | | | | | | |
| --- | --- | --- | --- | --- | --- | --- | --- | --- | --- | --- | --- | --- | --- | --- |
|  | At diagnosis | |  | At 1 year | |  | At 5 years | |  | At 10 years | |  |  |  |
|  | N | 5-year relative survival (95% CI) |  | N survived to 1 year | 5-year relative survival (95% CI) |  | N survived to 5 years | 5-year relative survival (95% CI) |  | N survived to 10 years | 5-year relative survival (95% CI) |  | >90% from year | >95% from year |
| **Stage** |  |  |  |  |  |  |  |  |  |  |  |  |  |  |
| Localized |  |  |  |  |  |  |  |  |  |  |  |  |  |  |
| White | 69525 | 96.2 (95.9, 96.5) |  | 67486 | 96.6 (96.3, 96.9) |  | 59879 | 98.8 (98.4, 99.1) |  | 29947 | 98.6 (97.8, 99.1) |  | 0 | 0 |
| Black | 6127 | 85.3 (84.1, 86.4) |  | 5728 | 87.8 (86.6, 88.9) |  | 4687 | 94.7 (93.2, 95.9) |  | 2032 | 97.2 (93.3, 98.8) |  | 2 | 6 |
| Other a | 6400 | 94.8 (94.1, 95.5) |  | 6238 | 94.9 (94.1, 95.5) |  | 5630 | 96.5 (95.5, 97.3) |  | 2619 | 96.2 (94.3, 97.5) |  | 0 | 2 |
| Regional |  |  |  |  |  |  |  |  |  |  |  |  |  |  |
| White | 19474 | 70.5 (69.8, 71.2) |  | 17279 | 75.2 (74.4, 75.9) |  | 12189 | 89.2 (88.3, 90.1) |  | 5194 | 91.2 (89.3, 92.7) |  | 6 | -- |
| Black | 2931 | 46.9 (44.9, 48.9) |  | 2319 | 55.4 (53.1, 57.6) |  | 1214 | 85.6 (82.0, 88.6) |  | 441 | 90.0 (81.2, 94.8) |  | 7 b | -- |
| Other a | 2047 | 71.8 (69.6, 73.8) |  | 1823 | 77.2 (75.0, 79.2) |  | 1341 | 91.3 (88.8, 93.2) |  | 574 | 93.9 (88.7, 96.8) |  | 5 | 8c |
| Distant |  |  |  |  |  |  |  |  |  |  |  |  |  |  |
| White | 7464 | 18.3 (17.4, 19.3) |  | 3724 | 32.7 (31.1, 34.3) |  | 1221 | 78.5 (75.1, 81.5) |  | 489 | 87.2 (80.8, 91.5) |  | 11 | -- |
| Black | 1813 | 9.9 (8.5, 11.4) |  | 707 | 21.8 (18.6, 25.1) |  | 161 | 65.7 (55.2, 74.4) |  | 48 | 83.0 (53.4, 94.6) |  | -- | -- |
| Other a | 825 | 19.0 (16.3, 21.8) |  | 421 | 32.2 (27.6, 36.9) |  | 143 | 75.0 (65.1, 82.5) |  | 49 | 89.9 (64.1, 97.5) |  | 8b | -- |
| **Histology** | |  |  |  |  |  |  |  |  |  |  |  |  |  |
| Endometrioid |  |  |  |  |  |  |  |  |  |  |  |  |  |  |
| White | 79691 | 91.0 (90.8, 91.3) |  | 75243 | 93.6 (93.3, 93.9) |  | 64882 | 97.6 (97.2, 97.9) |  | 32291 | 97.7 (97.0, 98.3) |  | 0 | 2 |
| Black | 6661 | 76.8 (75.5, 78.0) |  | 5867 | 83.3 (82.1, 84.5) |  | 4583 | 93.8 (92.2, 95.0) |  | 1989 | 96.6 (92.9, 98.4) |  | 3 | 6 |
| Other a | 7386 | 90.5 (89.7, 91.3) |  | 7010 | 92.6 (91.8, 93.3) |  | 6185 | 95.9 (95.0, 96.7) |  | 2892 | 95.7 (93.8, 97.0) |  | 0 | 5 |
| Serous |  |  |  |  |  |  |  |  |  |  |  |  |  |  |
| White | 4166 | 50.9 (49.2, 52.6) |  | 3499 | 56.0 (54.1, 57.9) |  | 1837 | 88.0 (84.9, 90.5) |  | 672 | 92.8 (84.5, 96.8) |  | 6 | 7c |
| Black | 1245 | 40.0 (36.9, 43.0) |  | 944 | 48.2 (44.5, 51.7) |  | 431 | 79.2 (72.1, 84.7) |  | 116 | 85.2 (56.9, 95.6) |  | 8b | 8c |
| Other a | 419 | 48.8 (43.6, 53.8) |  | 353 | 54.7 (49.0, 60.0) |  | 190 | 81.0 (70.1, 88.2) |  | 56 | 88.8 (72.7, 95.7) |  | 11b | 11c |
| Carcinosarcoma |  |  |  |  |  |  |  |  |  |  |  |  |  |  |
| White | 3834 | 42.3 (40.6, 44.1) |  | 2587 | 59.1 (56.8, 61.2) |  | 1410 | 88.8 (85.4, 91.5) |  | 568 | 90.4 (82.4, 94.9) |  | 6b | -- |
| Black | 1249 | 28.4 (25.7, 31.1) |  | 759 | 44.1 (40.1, 47.9) |  | 309 | 87.7 (79.4, 92.8) |  | 115 | 87.9 (67.5, 95.8) |  | 7b | -- |
| Other a | 354 | 37.9 (32.6, 43.2) |  | 231 | 56.2 (49.0, 62.7) |  | 114 | 89.0 (74.0, 95.6) |  | 36 | 95.3 (74.6, 99.2) |  | 9 | 10c |
| Clear cell |  |  |  |  |  |  |  |  |  |  |  |  |  |  |
| White | 1075 | 60.8 (57.3, 64.2) |  | 865 | 70.9 (67.1, 74.5) |  | 560 | 90.3 (84.4, 94.0) |  | 246 | 91.5 (77.2, 97.0) |  | 4 | -- |
| Black | 261 | 45.0 (38.0, 51.7) |  | 195 | 55.5 (47.0, 63.3) |  | 99 | 87.7 (68.6, 95.5) |  | 38 | 93.0 (46.9, 99.3) |  | 6b | -- |
| Other a | 131 | 63.7 (54.0, 71.9) |  | 113 | 69.3 (58.7, 77.7) |  | 75 | 91.9 (72.5, 97.8) |  | 29 | 94.6 (41.9, 99.6) |  | 5 | 11c |
| Mixed |  |  |  |  |  |  |  |  |  |  |  |  |  |  |
| White | 4476 | 79.4 (77.9, 80.8) |  | 4104 | 83.4 (81.9, 84.8) |  | 3169 | 94.9 (92.8, 96.4) |  | 1100 | 95.9 (89.8, 98.4) |  | 3 | 6 |
| Black | 537 | 61.9 (57.0, 66.3) |  | 448 | 70.5 (65.3, 75.1) |  | 292 | 92.6 (84.2, 96.7) |  | 83 | 89.4 (58.2, 97.7) |  | 5b | 7c |
| Other a | 440 | 78.6 (74.0, 82.4) |  | 401 | 83.6 (79.0, 87.2) |  | 313 | 90.9 (84.0, 94.9) |  | 105 | 98.1 (38.9, 100.0) |  | 4 | 9 |
| Other |  |  |  |  |  |  |  |  |  |  |  |  |  |  |
| White | 6940 | 50.6 (49.3, 51.8) |  | 4806 | 68.3 (66.8, 69.7) |  | 3118 | 88.6 (86.8, 90.1) |  | 1547 | 93.7 (90.9, 95.7) |  | 7 | 12 |
| Black | 1579 | 40.1 (37.5, 42.6) |  | 969 | 62.0 (58.6, 65.3) |  | 579 | 87.2 (82.7, 90.5) |  | 268 | 94.1 (84.3, 97.9) |  | 7b | -- |
| Other a | 829 | 50.9 (47.3, 54.4) |  | 596 | 66.6 (62.5, 70.4) |  | 390 | 87.3 (82.2, 91.1) |  | 174 | 94.2 (83.3, 98.1) |  | 7b | -- |
| **Grade** |  |  |  |  |  |  |  |  |  |  |  |  |  |  |
| 1,2 |  |  |  |  |  |  |  |  |  |  |  |  |  |  |
| White | 63970 | 95.2 (95.0, 95.5) |  | 61768 | 96.1 (95.8, 96.4) |  | 54746 | 98.2 (97.8, 98.5) |  | 28215 | 98.0 (97.2, 98.5) |  | 0 | 0 |
| Black | 4835 | 84.9 (83.6, 86.2) |  | 4510 | 87.6 (86.2, 88.8) |  | 3713 | 94.2 (92.5, 95.5) |  | 1701 | 97.8 (93.0, 99.3) |  | 3 | 6 c |
| Other a | 6070 | 94.3 (93.6, 95.0) |  | 5879 | 94.6 (93.8, 95.3) |  | 5311 | 96.1 (95.1, 96.8) |  | 2572 | 96.3 (94.4, 97.6) |  | 0 | 4 |
| 3, undifferentiated |  |  |  |  |  |  |  |  |  |  |  |  |  |  |
| White | 21011 | 58.5 (57.8, 59.3) |  | 16872 | 68.8 (68.0, 69.6) |  | 10759 | 91.0 (89.9, 91.9) |  | 4798 | 95.0 (92.9, 96.5) |  | 5 | -- |
| Black | 4200 | 41.8 (40.1, 43.4) |  | 2969 | 55.3 (53.3, 57.3) |  | 1533 | 88.7 (85.5, 91.3) |  | 577 | 93.4 (86.1, 96.9) |  | 6 | 8 c |
| Other a | 2210 | 57.0 (54.8, 59.2) |  | 1777 | 68.3 (65.9, 70.5) |  | 1158 | 90.7 (87.8, 93.0) |  | 495 | 92.5 (86.5, 95.9) |  | 5 | -- |
|  |  |  |  |  |  |  |  |  |  |  |  |  |  |  |
| a Asian/Pacific Islander, American Indian/Alaska Native | | | | |  |  |  |  |  |  |  |  |  |  |
| b Exceeded 90% at indicated year but decreased to <90% before 12 years after diagnosis | | | | | |  |  |  |  |  |  |  |  |  |
| c Exceeded 95% at indicated year but decreased to <95% before 12 years after diagnosis | | | | | |  |  |  |  |  |  |  |  |  |

| Supplementary Table 2. Standardized mortality ratios for endometrial cancer mortality among women with endometrial cancer, according to age at diagnosis and cancer characteristics, SEER 18, 2000-2017 | | | | | | | | | | | | | | | |
| --- | --- | --- | --- | --- | --- | --- | --- | --- | --- | --- | --- | --- | --- | --- | --- |
|  | Diagnosis - <1 year | | | 1 year- <5 years | | | 5 years-<10 years | | | 10+ years | | | Total | | |
|  | N deaths | SMR (95% CI) | AER | N deaths | SMR (95% CI) | AER | N deaths | SMR (95% CI) | AER | N deaths | SMR (95% CI) | AER | N deaths | SMR (95% CI) | AER |
| **Age at diagnosis** |  |  |  |  |  |  |  |  |  |  |  |  |  |  |  |
| 15-39 | 162 | 5759.52 (4906.75, 6717.89) | 236 | 240 | 1881.97 (1651.38, 2135.74) | 115 | 41 | 222.75 (159.85, 302.19) | 26 | 8 | 37.48 (16.18, 73.86) | 10 | 451 | 815.35 (741.83, 894.19) | 88 |
| 40-64 | 3992 | 553.72 (536.67, 571.17) | 423 | 5513 | 209.28 (203.80) | 196 | 1055 | 39.81 (37.45, 42.29) | 50 | 184 | 10.36 (8.92, 11.97) | 17 | 10744 | 138.09 (135.49, 140.72) | 157 |
| 65+ | 6363 | 423.85 (413.50, 434.39) | 986 | 7016 | 176.53 (172.42, 180.71) | 425 | 945 | 35.56 (33.33, 37.90) | 93 | 116 | 9.89 (8.17, 11.86) | 26 | 14440 | 155.16 (152.64, 157.71) | 391 |
| **Summary stage** |  |  |  |  |  |  |  |  |  |  |  |  |  |  |  |
| Localized | 1242 | 83.57 (78.99, 88.35) | 105 | 3691 | 74.00 (71.63, 76.42) | 102 | 953 | 22.19 (20.80, 23.64) | 35 | 163 | 6.60 (5.63, 7.70) | 11 | 6049 | 45.69 (44.55, 46.86) | 70 |
| Regional | 2637 | 536.67 (516.38, 557.55) | 792 | 5166 | 404.07 (393.13, 415.24) | 611 | 784 | 92.20 (85.86, 98.88) | 155 | 95 | 23.70 (19.17, 28.97) | 45 | 8682 | 287.38 (281.36, 293.49) | 460 |
| Distant | 5558 | 3451.27 (3361.13, 3543.22) | 5360 | 3197 | 1728.91 (1669.49, 1789.90) | 2524 | 203 | 276.39 (239.67, 317.14) | 427 | 31 | 86.90 (59.05, 123.35) | 162 | 8989 | 1975.28 (1934.65, 2016.54) | 3031 |
| Unknown | 1080 | 1249.56 (1176.14, 1326.36) | 2110 | 715 | 420.68 (390.41, 452.68) | 612 | 101 | 94.71 (77.14, 115.08) | 139 | 19 | 29.27 (17.62, 45.70) | 51 | 1915 | 447.47 (427.66, 467.98) | 694 |
| **Histology** |  |  |  |  |  |  |  |  |  |  |  |  |  |  |  |
| Endometrioid | 3980 | 243.94 (236.42, 251.64) | 307 | 6118 | 114.57 (111.72, 117.48) | 157 | 1356 | 29.71 (28.15, 31.33) | 47 | 225 | 8.54 (7.46, 9.73) | 15 | 11679 | 82.42 (80.93, 83.93) | 125 |
| Serous | 1102 | 588.55 (554.31, 624.35) | 1213 | 2143 | 557.05 (533.72, 581.15) | 1200 | 216 | 121.81 (106.11, 139.19) | 286 | 14 | 20.20 (11.05, 33.90) | 50 | 3475 | 424.53 (410.53, 438.88) | 936 |
| Carcinosarcoma | 1845 | 1410.27 (1346.65, 1476.13) | 2761 | 1663 | 713.96 (680.06, 749.12) | 1402 | 108 | 81.42 (66.79, 98.31) | 177 | 2 | 3.50 (0.42, 12.65) | 6 | 3618 | 653.67 (632.55, 675.33) | 1344 |
| Clear cell | 283 | 750.35 (665.47, 843.06) | 1454 | 350 | 407.31 (365.75, 452.29) | 807 | 39 | 72.53 (51.57, 99.15) | 154 | 7 | 28.92 (11.63, 59.60) | 65 | 679 | 336.77 (311.92, 363.09) | 690 |
| Mixed | 486 | 392.68 (358.54, 429.20) | 584 | 930 | 272.48 (255.24, 290.57) | 429 | 103 | 47.05 (38.40, 57.06) | 83 | 13 | 17.01 (9.06, 29.10) | 34 | 1532 | 201.47 (191.51, 211.82) | 334 |
| Other | 2821 | 2475.80 (2385.27, 2568.88) | 2750 | 1565 | 661.03 (628.68, 694.61) | 686 | 219 | 122.32 (106.66, 139.64) | 148 | 47 | 43.08 (31.65, 57.29) | 64 | 4652 | 728.21 (707.43, 749.44) | 845 |
|  |  |  |  |  |  |  |  |  |  |  |  |  |  |  |  |
| **Grade** |  |  |  |  |  |  |  |  |  |  |  |  |  |  |  |
| 1 | 410 | 62.76 (56.83, 69.14) | 69 | 999 | 41.84 (39.28, 44.51) | 52 | 373 | 16.69 (15.04, 18.47) | 24 | 95 | 7.09 (5.73, 8.67) | 12 | 1877 | 28.37 (27.10, 29.68) | 39 |
| 2 | 922 | 180.42 (168.96, 192.45) | 235 | 2286 | 128.57 (123.36, 133.95) | 184 | 574 | 35.94 (33.06, 39.00) | 60 | 97 | 10.35 (8.39, 12.62) | 19 | 3879 | 80.42 (77.91, 82.99) | 127 |
| 3 | 3681 | 860.20 (832.64, 888.45) | 1444 | 4626 | 436.61 (424.12, 449.38) | 755 | 559 | 78.96 (69.79, 82.53) | 145 | 61 | 16.36 (12.51, 21.01) | 34 | 8927 | 343.84 (336.75, 351.05) | 630 |
| Undifferentiated | 2019 | 1258.76 (1204.45, 1314.89) | 2153 | 2044 | 649.43 (621.58, 678.21) | 1160 | 157 | 95.54 (81.18, 111.71) | 187 | 14 | 20.28 (11.09, 34.02) | 42 | 4234 | 597.60 (579.73, 615.87) | 1099 |
| Other/unknown | 3485 | 737.73 (713.44, 762.64) | 1049 | 2814 | 260.27 (250.74, 270.06) | 381 | 378 | 63.70 (57.44, 70.46) | 105 | 41 | 16.35 (11.74, 22.19) | 30 | 6718 | 280.18 (273.52, 286.97) | 433 |
|  |  |  |  |  |  |  |  |  |  |  |  |  |  |  |  |
|  | | | | | | | | | | | | | | |  |
|  | | | | | | | | | | | | | | | |

| Supplementary Table 3. Standardized mortality ratios for other cancer (non-endometrial cancer) mortality among women with endometrial cancer, according to age at diagnosis and cancer characteristics, SEER 18, 2000-2017 | | | | | | | | | | | | | | | |
| --- | --- | --- | --- | --- | --- | --- | --- | --- | --- | --- | --- | --- | --- | --- | --- |
|  | Diagnosis - <1 year | | | 1 year- <5 years | | | 5 years-<10 years | | | 10+ years | | | Total | | |
|  | N deaths | SMR (95% CI) | AER | N deaths | SMR (95% CI) | AER | N deaths | SMR (95% CI) | AER | N deaths | SMR (95% CI) | AER | N deaths | SMR (95% CI) | AER |
| **Age at diagnosis** |  |  |  |  |  |  |  |  |  |  |  |  |  |  |  |
| 15-39 | 50 | 39.39 (29.23, 51.93) | 71 | 101 | 19.06 (15.52, 23.16) | 46 | 33 | 4.98 (3.43, 6.99) | 17 | 9 | 1.45 (0.66, 2.75) | 3 | 193 | 9.94 (8.59, 11.45) | 34 |
| 40-64 | 1061 | 5.56 (5.23, 5.91) | 92 | 1767 | 2.64 (2.52, 2.77) | 39 | 874 | 1.36 (1.27, 1.45) | 11 | 455 | 1.06 (0.96, 1.16) | 2 | 4157 | 2.15 (2.08, 2.22) | 33 |
| 65+ | 1483 | 3.16 (3.00, 3.33) | 158 | 2338 | 1.82 (1.74, 1.89) | 64 | 1063 | 1.17 (1.10, 1.24) | 15 | 449 | 1.06 (0.97, 1.17) | 7 | 5333 | 1.73 (1.68, 1.77) | 61 |
| **Summary stage** |  |  |  |  |  |  |  |  |  |  |  |  |  |  |  |
| Localized | 341 | 0.77 (0.69, 0.85) | -9 | 1850 | 1.24 (1.19, 1.30) | 10 | 1342 | 1.06 (1.01, 1.12) | 3 | 700 | 0.98 (0.90, 1.05) | -1 | 4233 | 1.08 (1.05, 1.11) | 4 |
| Regional | 531 | 3.70 (3.39, 4.03) | 117 | 1234 | 3.33 (3.14, 3.52) | 102 | 465 | 1.90 (1.73, 2.08) | 44 | 167 | 1.48 (1.26, 1.72) | 27 | 2397 | 2.75 (2.64, 2.86) | 81 |
| Distant | 1533 | 34.33 (32.63, 36.09) | 1436 | 935 | 17.88 (16.76, 19.07) | 697 | 85 | 4.06 (3.24, 5.02) | 135 | 21 | 2.07 (1.28, 3.16) | 58 | 2574 | 20.11 (19.34, 20.90) | 825 |
| Unknown | 189 | 6.79 (5.86, 7.83) | 315 | 187 | 3.57 (3.08, 4.12) | 115 | 78 | 2.48 (1.96, 3.10) | 65 | 25 | 1.38 (0.89, 2.03) | 19 | 479 | 3.69 (3.37, 4.04) | 127 |
| **Histology** |  |  |  |  |  |  |  |  |  |  |  |  |  |  |  |
| Endometrioid | 873 | 1.76 (1.64, 1.88) | 29 | 2193 | 1.37 (1.31, 1.42) | 15 | 1485 | 1.10 (1.05, 1.16) | 5 | 785 | 1.03 (0.95, 1.10) | 1 | 5336 | 1.27 (1.23, 1.30) | 12 |
| Serous | 230 | 4.67 (4.08, 5.31) | 199 | 554 | 5.43 (4.99, 5.90) | 253 | 92 | 1.87 (1.51, 2.29) | 57 | 26 | 1.28 (0.84, 1.88) | 22 | 902 | 4.08 (3.82, 4.36) | 184 |
| Carcinosarcoma | 416 | 11.89 (10.77, 13.08) | 571 | 376 | 5.97 (5.38, 6.60) | 264 | 76 | 2.08 (1.64, 2.60) | 66 | 24 | 1.51 (0.97, 2.24) | 35 | 892 | 5.93 (5.54, 6.33) | 276 |
| Clear cell | 58 | 5.36 (4.07, 6.93) | 243 | 86 | 3.49 (2.79, 4.31) | 142 | 29 | 1.88 (1.26, 2.70) | 54 | 5 | 0.72 (0.24, 1.69) | -18 | 178 | 3.08 (2.64, 3.57) | 123 |
| Mixed | 101 | 2.89 (2.35, 3.51) | 80 | 221 | 2.30 (2.01, 2.62) | 58 | 90 | 1.46 (1.17, 1.79) | 23 | 23 | 1.07 (0.68, 1.60) | 4 | 435 | 2.03 (1.84, 2.23) | 48 |
| Other | 916 | 26.68 (24.98, 28.47) | 860 | 776 | 11.06 (10.29, 11.86) | 310 | 198 | 3.93 (3.40, 4.52) | 100 | 50 | 1.76 (1.30, 2.32) | 30 | 1940 | 10.58 (10.12, 11.06) | 320 |
|  |  |  |  |  |  |  |  |  |  |  |  |  |  |  |  |
| **Grade** |  |  |  |  |  |  |  |  |  |  |  |  |  |  |  |
| 1 | 120 | 0.60 (0.49, 0.71) | -14 | 662 | 0.92 (0.85, 0.99) | -3 | 611 | 0.93 (0.86, 1.01) | -3 | 387 | 1.00 (0.91, 1.11) | 0 | 1780 | 0.91 (0.86, 0.95) | 4 |
| 2 | 233 | 1.45 (1.27, 1.65) | 19 | 834 | 1.53 (1.42, 1.63) | 23 | 581 | 1.22 (1.12, 1.32) | 11 | 293 | 1.06 (0.95, 1.19) | 4 | 1941 | 1.33 (1.27, 1.39) | 16 |
| 3 | 762 | 6.09 (5.66, 6.54) | 250 | 1235 | 3.98 (3.76, 4.20) | 151 | 370 | 1.73 (1.55, 1.91) | 41 | 115 | 1.07 (0.88, 1.28) | 4 | 2482 | 3.28 (3.15, 3.41) | 122 |
| Undifferentiated | 403 | 9.34 (8.45, 10.30) | 384 | 541 | 6.30 (5.78, 6.86) | 259 | 106 | 2.29 (1.88, 2.78) | 72 | 32 | 1.65 (1.13, 2.33) | 40 | 1082 | 5.56 (5.23, 5.90) | 231 |
| Other/unknown | 1076 | 8.25 (7.77, 8.76) | 285 | 934 | 3.13 (2.93, 3.34) | 86 | 302 | 1.81 (1.61, 2.02) | 38 | 86 | 1.21 (0.97, 1.50) | 12 | 2398 | 3.60 (3.45, 3.74) | 112 |
|  |  |  |  |  |  |  |  |  |  |  |  |  |  |  |  |
| a | | | | | | | |  |  |  |  |  |  |  |  |
|  | | | | | | | |  |  |  |  |  |  |  |  |

| Supplementary Table 4. Standardized mortality ratios for cardiovascular disease mortality among women with endometrial cancer, according to age at diagnosis and cancer characteristics, SEER 18, 2000-2017 | | | | | | | | | | | | | | | |
| --- | --- | --- | --- | --- | --- | --- | --- | --- | --- | --- | --- | --- | --- | --- | --- |
|  | Diagnosis - <1 year | | | 1 year- <5 years | | | 5 years-<10 years | | | 10+ years | | | Total | | |
|  | N deaths | SMR (95% CI) | AER | N deaths | SMR (95% CI) | AER | N deaths | SMR (95% CI) | AER | N deaths | SMR (95% CI) | AER | N deaths | SMR (95% CI) | AER |
| **Age at diagnosis** |  |  |  |  |  |  |  |  |  |  |  |  |  |  |  |
| 15-39 | 5 | 5.94 (1.93, 13.85) | 6 | 11 | 3.19 (1.59, 5.71) | 4 | 10 | 2.38 (1.14, 4.38) | 4 | 16 | 4.09 (2.34, 6.65) | 15 | 42 | 3.39 (2.44, 4.58) | 6 |
| 40-64 | 262 | 2.29 (2.02, 2.58) | 16 | 532 | 1.30 (1.20, 1.42) | 4 | 536 | 1.28 (1.17, 1.39) | 6 | 432 | 1.28 (1.16, 1.40) | 9 | 1762 | 1.38 (1.31, 1.44) | 7 |
| 65+ | 1120 | 1.41 (1.33, 1.50) | 51 | 2011 | 0.88 (0.84, 0.92) | -16 | 1809 | 0.95 (0.90, 0.99) | -10 | 1239 | 1.11 (1.05, 1.18) | 32 | 6179 | 1.01 (0.99, 1.04) | 2 |
| **Summary stage** |  |  |  |  |  |  |  |  |  |  |  |  |  |  |  |
| Localized | 584 | 1.02 (0.94, 1.11) | 1 | 1618 | 0.81 (0.77, 0.85) | -11 | 1791 | 0.95 (0.90, 0.99) | -4 | 1359 | 1.11 (1.05, 1.17) | 11 | 5352 | 0.94 (0.92, 0.97) | -4 |
| Regional | 321 | 1.55 (1.39, 1.73) | 34 | 607 | 1.16 (1.07, 1.26) | 10 | 436 | 1.19 (1.08, 1.30) | 14 | 269 | 1.45 (1.28, 1.64) | 41 | 1633 | 1.28 (1.21, 1.34) | 19 |
| Distant | 195 | 3.10 (2.68, 3.57) | 127 | 98 | 1.45 (1.18, 1.76) | 24 | 34 | 1.25 (0.86, 1.74) | 14 | 21 | 1.21 (0.75, 1.85) | 20 | 348 | 1.99 (1.78, 2.21) | 58 |
| Unknown | 287 | 4.28 (3.80, 4.81) | 430 | 231 | 2.35 (2.06, 2.67) | 114 | 94 | 1.89 (1.53, 2.32) | 62 | 38 | 1.35 (0.96, 1.86) | 28 | 650 | 2.67 (2.47, 2.89) | 148 |
| **Histology** |  |  |  |  |  |  |  |  |  |  |  |  |  |  |  |
| Endometrioid | 873 | 1.33 (1.24, 1.42) | 17 | 1983 | 0.91 (0.87, 0.95) | -5 | 2023 | 1.01 (0.97, 1.06) | 1 | 1490 | 1.15 (1.09, 1.21) | 15 | 6369 | 1.04 (1.01, 1.07) | 3 |
| Serous | 98 | 1.36 (1.11, 1.66) | 29 | 154 | 1.02 (0.86, 1.19) | 1 | 80 | 0.97 (0.77, 1.21) | -3 | 57 | 1.38 (1.04, 1.78) | 59 | 389 | 1.12 (1.01, 1.24) | 11 |
| Carcinosarcoma | 128 | 2.35 (1.96, 2.80) | 110 | 107 | 1.12 (0.92, 1.35) | 10 | 58 | 0.92 (0.70, 1.19) | -9 | 39 | 1.26 (0.90, 1.72) | 34 | 332 | 1.36 (1.22, 1.51) | 33 |
| Clear cell | 33 | 1.84 (1.27, 2.58) | 78 | 46 | 1.14 (0.83, 1.52) | 13 | 32 | 1.19 (0.81, 1.68) | 20 | 18 | 1.36 (0.80, 2.15) | 46 | 129 | 1.31 (1.09, 1.55) | 31 |
| Mixed | 59 | 1.27 (0.96, 1.63) | 15 | 127 | 0.97 (0.81, 1.16) | -2 | 85 | 0.94 (0.75, 1.16) | -4 | 34 | 0.97 (0.67, 1.36) | -2 | 305 | 1.01 (0.90, 1.13) | 1 |
| Other | 196 | 3.34 (2.89, 3.85) | 134 | 137 | 1.36 (1.14, 1.61) | 16 | 77 | 1.09 (0.86, 1.36) | 4 | 49 | 1.20 (0.89, 1.59) | 12 | 459 | 1.70 (1.54, 1.86) | 34 |
|  |  |  |  |  |  |  |  |  |  |  |  |  |  |  |  |
| **Grade** |  |  |  |  |  |  |  |  |  |  |  |  |  |  |  |
| 1 | 267 | 1.10 (0.97, 1.24) | 4 | 772 | 0.85 (0.79, 0.91) | -7 | 916 | 0.99 (0.93, 1.06) | 0 | 695 | 1.11 (1.03, 1.20) | 10 | 2650 | 0.98 (0.94, 1.02) | -1 |
| 2 | 263 | 1.17 (1.04, 1.32) | 10 | 702 | 0.91 (0.84, 0.98) | -6 | 753 | 1.03 (0.96, 1.11) | 2 | 541 | 1.14 (1.05, 1.24) | 15 | 2259 | 1.02 (0.98, 1.07) | 2 |
| 3 | 329 | 1.68 (1.51, 1.88) | 53 | 521 | 1.08 (0.99, 1.18) | 6 | 364 | 1.02 (0.92, 1.13) | 2 | 257 | 1.29 (1.13, 1.45) | 34 | 1471 | 1.19 (1.13, 1.25) | 17 |
| Undifferentiated | 116 | 1.88 (1.55, 2.25) | 58 | 135 | 1.08 (0.91, 1.28) | 6 | 74 | 0.96 (0.76, 1.21) | -3 | 36 | 1.04 (0.73, 1.45) | 5 | 361 | 1.21 (1.09, 1.35) | 17 |
| Other/unknown | 412 | 2.23 (2.02, 2.46) | 68 | 424 | 1.06 (0.96, 1.16) | 3 | 248 | 1.00 (0.88, 1.13) | 0 | 158 | 1.32 (1.12, 1.54) | 30 | 1242 | 1.30 (1.23, 1.38) | 19 |
|  |  |  |  |  |  |  |  |  |  |  |  |  |  |  |  |
|  | | | | | | |  |  |  |  |  |  |  |  |  |
|  | | | | | | |  |  |  |  |  |  |  |  |  |

| Supplementary Table 5. Standardized mortality ratios for other-cause (non-cancer, non-CVD) mortality among women with endometrial cancer, according to age at diagnosis and cancer characteristics, SEER 18, 2000-2017 | | | | | | | | | | | | | | | |
| --- | --- | --- | --- | --- | --- | --- | --- | --- | --- | --- | --- | --- | --- | --- | --- |
|  | Diagnosis - <1 year | | | 1 year- <5 years | | | 5 years-<10 years | | | 10+ years | | | Total | | |
|  | N deaths | SMR (95% CI) | AER | N deaths | SMR (95% CI) | AER | N deaths | SMR (95% CI) | AER | N deaths | SMR (95% CI) | AER | N deaths | SMR (95% CI) | AER |
| **Age at diagnosis** |  |  |  |  |  |  |  |  |  |  |  |  |  |  |  |
| 15-39 | 18 | 4.25 (2.52, 6.72) | 20 | 43 | 2.96 (2.14, 3.99) | 14 | 38 | 2.73 (1.93, 3.75) | 15 | 42 | 4.06 (2.93, 5.49) | 39 | 141 | 3.28 (2.76, 3.87) | 19 |
| 40-64 | 453 | 2.27 (2.07, 2.49) | 27 | 862 | 1.23 (1.15, 1.32) | 6 | 820 | 1.15 (1.08, 1.23) | 5 | 675 | 1.19 (1.10, 1.28) | 11 | 2810 | 1.29 (1.24, 1.34) | 9 |
| 65+ | 1086 | 1.17 (1.10, 1.24) | 25 | 2207 | 0.79 (0.76, 0.83) | -35 | 2093 | 0.84 (0.81, 0.88) | -39 | 1497 | 1.00 (0.95, 1.05) | -1 | 6883 | 0.90 (0.57, 0.92) | -22 |
| **Summary stage** |  |  |  |  |  |  |  |  |  |  |  |  |  |  |  |
| Localized | 600 | 0.83 (0.76, 0.89) | -11 | 1927 | 0.74 (0.70, 0.77) | -19 | 2237 | 0.86 (0.83, 0.90) | -14 | 1760 | 1.01 (0.96, 1.05) | 1 | 6524 | 0.85 (0.83, 0.87) | -14 |
| Regional | 370 | 1.45 (1.31, 1.61) | 35 | 786 | 1.16 (1.08, 1.25) | 13 | 569 | 1.13 (1.04, 1.22) | 13 | 377 | 1.42 (1.28, 1.57) | 55 | 2102 | 1.24 (1.18, 1.29) | 21 |
| Distant | 310 | 4.00 (3.57, 4.47) | 224 | 160 | 1.80 (1.53, 2.10) | 56 | 41 | 1.06 (0.76, 1.43) | 5 | 28 | 1.13 (0.75, 1.64) | 17 | 539 | 2.35 (2.15, 2.55) | 104 |
| Unknown | 277 | 3.81 (3.37, 4.28) | 399 | 239 | 2.06 (1.80, 2.34) | 105 | 104 | 1.57 (1.28, 1.90) | 53 | 49 | 1.20 (0.89, 1.59) | 23 | 669 | 2.26 (2.09, 2.44) | 135 |
| **Histology** |  |  |  |  |  |  |  |  |  |  |  |  |  |  |  |
| Endometrioid | 905 | 1.10 (1.02, 1.17) | 6 | 2394 | 0.85 (0.81, 0.88) | -11 | 2523 | 0.92 (0.88, 0.95) | -8 | 1958 | 1.06 (1.01, 1.11) | 8 | 7780 | 0.94 (0.92, 0.96) | -5 |
| Serous | 109 | 1.23 (1.01, 1.49) | 23 | 191 | 0.99 (0.86, 1.14) | -1 | 94 | 0.86 (0.69, 1.05) | -21 | 50 | 0.88 (0.65, 1.16) | -26 | 444 | 0.99 (0.90, 1.09) | -1 |
| Carcinosarcoma | 139 | 2.15 (1.81, 2.54) | 111 | 131 | 1.09 (0.91, 1.29) | 9 | 83 | 1.00 (0.79, 1.23) | -1 | 66 | 1.55 (1.20, 1.97) | 100 | 419 | 1.35 (1.22, 1.48) | 40 |
| Clear cell | 34 | 1.61 (1.11, 2.24) | 66 | 51 | 1.03 (0.76, 1.35) | 3 | 25 | 0.70 (0.45, 1.04) | -42 | 18 | 0.98 (0.58, 1.55) | -3 | 128 | 1.03 (0.86, 1.22) | 3 |
| Mixed | 76 | 1.24 (0.98, 1.55) | 18 | 155 | 0.87 (0.74, 1.02) | -11 | 123 | 0.96 (0.80, 1.15) | -4 | 55 | 1.09 (0.82, 1.42) | 13 | 409 | 0.98 (0.89, 1.08) | -2 |
| Other | 294 | 4.24 (3.77, 4.75) | 219 | 190 | 1.47 (1.27, 1.70) | 27 | 103 | 1.05 (0.85, 1.27) | 3 | 67 | 1.12 (0.87, 1.42) | 10 | 654 | 1.83 (1.70, 1.98) | 54 |
|  |  |  |  |  |  |  |  |  |  |  |  |  |  |  |  |
| **Grade** |  |  |  |  |  |  |  |  |  |  |  |  |  |  |  |
| 1 | 253 | 0.81 (0.71, 0.92) | -10 | 902 | 0.75 (0.70, 0.80) | -16 | 1143 | 0.89 (0.84, 0.94) | -10 | 913 | 1.01 (0.95, 1.08) | 1 | 3211 | 0.87 (0.84, 0.90) | -11 |
| 2 | 271 | 1.00 (0.88, 1.12) | 0 | 790 | 0.80 (0.75, 0.86) | -16 | 907 | 0.91 (0.85, 0.97) | -10 | 716 | 1.06 (0.98, 1.14) | 9 | 2684 | 0.92 (0.88, 0.95) | -8 |
| 3 | 357 | 1.55 (1.39, 1.72) | 50 | 618 | 1.03 (0.95, 1.12) | 3 | 455 | 0.96 (0.87, 1.05) | -5 | 324 | 1.16 (1.04, 1.29) | 27 | 1754 | 1.11 (1.06, 1.16) | 12 |
| Undifferentiated | 164 | 2.11 (1.80, 2.45) | 92 | 186 | 1.15 (0.99, 1.33) | 14 | 86 | 0.83 (0.67, 1.03) | -21 | 63 | 1.30 (1.00, 1.67) | 46 | 499 | 1.27 (1.17, 1.39) | 28 |
| Other/unknown | 512 | 2.14 (1.96, 2.34) | 82 | 616 | 1.13 (1.04, 1.23) | 10 | 360 | 1.04 (0.94, 1.16) | 4 | 198 | 1.16 (1.00, 1.33) | 21 | 1686 | 1.30 (1.24, 1.36) | 25 |
|  |  |  |  |  |  |  |  |  |  |  |  |  |  |  |  |
| a | | | | | | | | | | | | | | | |
|  | | | | | | | | | | | | | | | |
